# Supplementary material for: Loss of C2orf69 defines a fatal auto-inflammatory mitochondriopathy in Humans and Zebrafish
Source: bioRxiv or medRxiv preprint supplement (doi:10.1101/2021.03.31.21253863), 2021-04-06
Supplement: Supplementary file [file media-2.pdf]

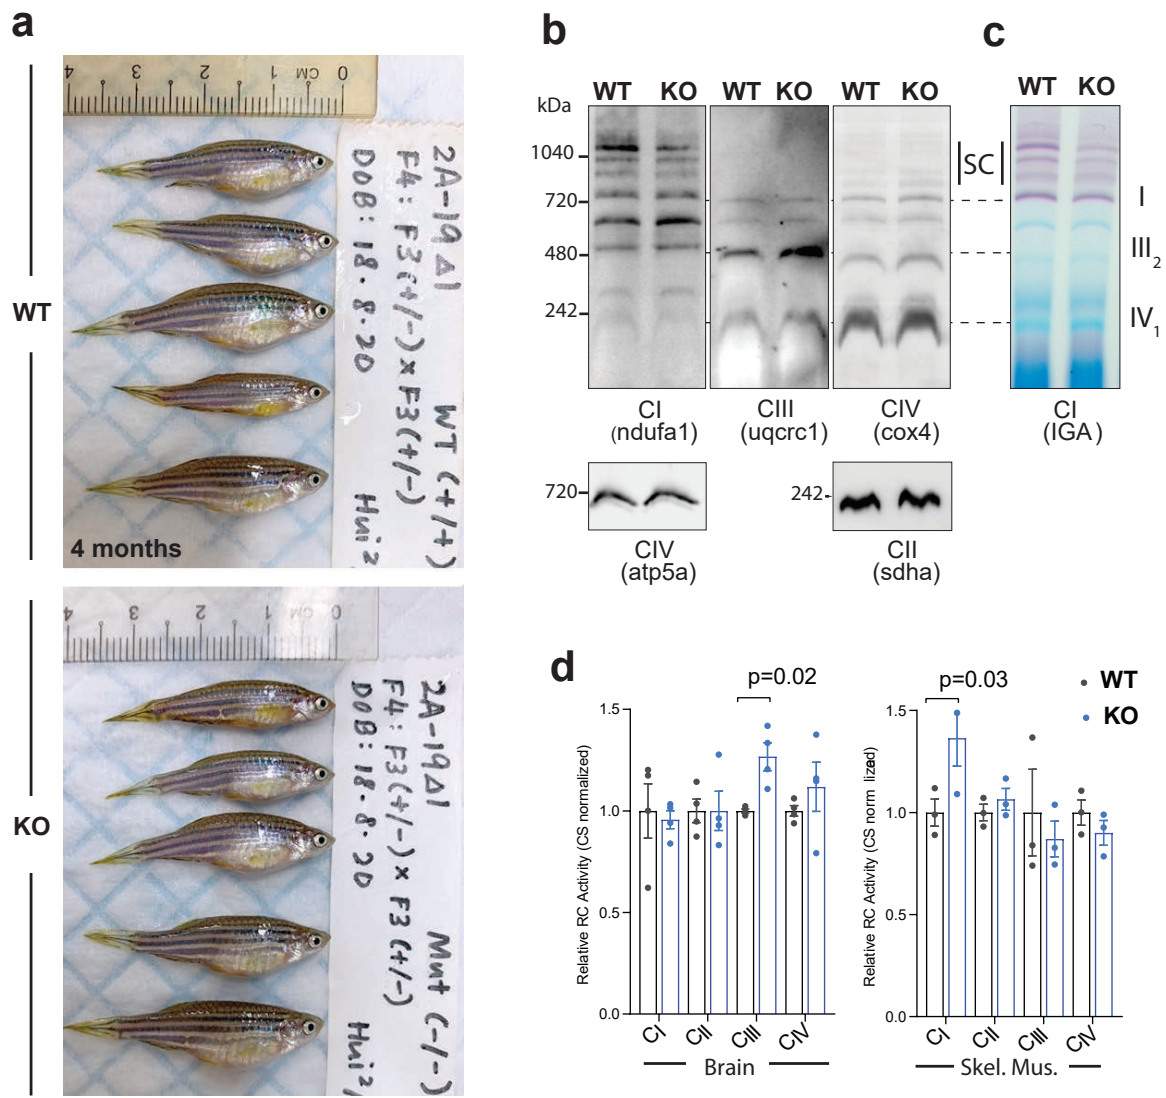

**Figure S4**  
HH. Wong *et al.*, (2021)
